# Supplementary material for: Free-radical conversion of a lignin model compound catalyzed by Pd/C
Source: Royal Society of Chemistry journal article supplement (doi:10.1039/c5gc01272d), 2015-01-01
Supplement: c5gc01272d1.pdf [file c5gc01272d1.pdf]

## Supplementary Information

### Free-radical conversion of lignin model compound catalyzed by Pd/C

Honglei Fan\*, Yingying Yang, Jinliang Song, Qinglei Meng, Tao Jiang, Guanying  
Yang, Buxing Han\*

<sup>a</sup> Beijing National Laboratory for Molecular Sciences, Institute of Chemistry, Chinese Academy of Sciences, Beijing 100190, China

\*Corresponding author, Tel: 86-10-62562821; E-mail: [hlfan@iccas.ac.cn](mailto:hlfan@iccas.ac.cn);  
[Hanbx@iccas.ac.cn](mailto:Hanbx@iccas.ac.cn)

### Catalyst characterization

N<sub>2</sub> adsorption-desorption isotherms were obtained using the Micromeritics ASAP 2020 V3.00 H (USA) surface area analyzer at 77 K under high vacuum. The samples were degassed at 120 °C for at least 12 h prior to the measurement.

**Table S1.** Properties of catalysts with Pd/C and Pd/HAP.

| Entry | Sample <sup>a</sup> | BET surface area (m <sup>2</sup> /g) <sup>b</sup> | Pore volume (cm <sup>3</sup> /g) <sup>c</sup> | Pore diameter (nm) <sup>d</sup> |
|-------|---------------------|---------------------------------------------------|-----------------------------------------------|---------------------------------|
| 1     | Pd/C                | 664                                               | 0.35                                          | 5.7                             |
| 2     | Pd/HAP              | 46                                                | 0.3                                           | 23                              |

<sup>a</sup>The samples were degassed at 120 °C for 24 h. <sup>b</sup>Surface area based on multipoint BET method.  
<sup>c</sup>Pore volume based on BJH method. <sup>d</sup>Pore diameter based on BJH method.
